# Supplementary material for: A Macroeconomic Review of the Factors Influencing Fruit Consumption in Romania—The Road towards Sustainability
Source: MDPI journal article supplement (doi:10.3390/su132212793), 2021-11-19
Supplement: s1 [file s1]

**Table S1.** Correlation matrix for the considered variables.

| Correlation<br>Probability | D_FRUIT<br>_CONS | FRUIT_<br>CONS_CAL | FRUIT<br>_PROD | FRUIT_<br>EXPORT | MEAT_<br>CONS | D_<br>GDP | D_<br>FDI | INFLATION<br>_FOOD | D_<br>EXCHANGE<br>_INDEX | D_<br>EMPLOYMENT | D_GOV_<br>EXP_EDU | TEMPERATURE<br>_CHANGE | GHG_<br>AGRI | D_<br>INFLATION<br>_FOOD | D_<br>MEAT<br>_CONS | D_FR_<br>CONS<br>_CAL | D_<br>GDP2 |
|----------------------------|------------------|--------------------|----------------|------------------|---------------|-----------|-----------|--------------------|--------------------------|------------------|-------------------|------------------------|--------------|--------------------------|---------------------|-----------------------|------------|
| D_FRUIT_CONS               | 1.000            |                    |                |                  |               |           |           |                    |                          |                  |                   |                        |              |                          |                     |                       |            |
|                            | ----             |                    |                |                  |               |           |           |                    |                          |                  |                   |                        |              |                          |                     |                       |            |
| FRUIT_CONS_CAL             | 0.381            | 1.000              |                |                  |               |           |           |                    |                          |                  |                   |                        |              |                          |                     |                       |            |
|                            | 0.042            | ----               |                |                  |               |           |           |                    |                          |                  |                   |                        |              |                          |                     |                       |            |
| FRUIT_PROD                 | 0.739            | 0.479              | 1.000          |                  |               |           |           |                    |                          |                  |                   |                        |              |                          |                     |                       |            |
|                            | 0.000            | 0.007              | ----           |                  |               |           |           |                    |                          |                  |                   |                        |              |                          |                     |                       |            |
| FRUIT_EXPORT               | 0.095            | 0.250              | 0.461          | 1.000            |               |           |           |                    |                          |                  |                   |                        |              |                          |                     |                       |            |
|                            | 0.632            | 0.192              | 0.012          | ----             |               |           |           |                    |                          |                  |                   |                        |              |                          |                     |                       |            |
| MEAT_CONS                  | 0.216            | 0.889              | 0.398          | 0.284            | 1.000         |           |           |                    |                          |                  |                   |                        |              |                          |                     |                       |            |
|                            | 0.259            | 0.000              | 0.030          | 0.136            | ----          |           |           |                    |                          |                  |                   |                        |              |                          |                     |                       |            |
| D_GDP                      | 0.291            | 0.589              | 0.159          | 0.126            | 0.519         | 1.000     |           |                    |                          |                  |                   |                        |              |                          |                     |                       |            |
|                            | 0.126            | 0.001              | 0.410          | 0.523            | 0.004         | ----      |           |                    |                          |                  |                   |                        |              |                          |                     |                       |            |
| D_FDI                      | 0.417            | 0.017              | 0.179          | 0.076            | -0.105        | 0.179     | 1.000     |                    |                          |                  |                   |                        |              |                          |                     |                       |            |
|                            | 0.024            | 0.929              | 0.352          | 0.699            | 0.589         | 0.352     | ----      |                    |                          |                  |                   |                        |              |                          |                     |                       |            |
| INFLATION_<br>FOOD         | -0.189           | -0.478             | -0.062         | -0.069           | -0.572        | -0.702    | 0.052     | 1.000              |                          |                  |                   |                        |              |                          |                     |                       |            |
|                            | 0.344            | 0.012              | 0.760          | 0.738            | 0.002         | 0.000     | 0.795     | ----               |                          |                  |                   |                        |              |                          |                     |                       |            |
| D_EXCHANGE_<br>INDEX       | 0.019            | -0.003             | 0.212          | 0.060            | -0.022        | 0.140     | 0.159     | -0.051             | 1.000                    |                  |                   |                        |              |                          |                     |                       |            |
|                            | 0.922            | 0.989              | 0.279          | 0.766            | 0.910         | 0.478     | 0.420     | 0.805              | ----                     |                  |                   |                        |              |                          |                     |                       |            |
| D_EMPLOYMENT               | -0.297           | -0.308             | -0.107         | -0.187           | -0.395        | -0.581    | -0.187    | 0.590              | 0.021                    | 1.000            |                   |                        |              |                          |                     |                       |            |
|                            | 0.125            | 0.111              | 0.588          | 0.351            | 0.038         | 0.001     | 0.341     | 0.002              | 0.914                    | ----             |                   |                        |              |                          |                     |                       |            |
| D_GOV_EXP_EDU              | 0.029            | -0.057             | -0.115         | -0.403           | -0.098        | 0.334     | 0.155     | 0.205              | 0.269                    | -0.167           | 1.000             |                        |              |                          |                     |                       |            |
|                            | 0.911            | 0.828              | 0.661          | 0.109            | 0.708         | 0.190     | 0.553     | 0.464              | 0.297                    | 0.522            | ----              |                        |              |                          |                     |                       |            |
| TEMPERATURE_<br>CHANGE     | -0.159           | 0.527              | -0.156         | -0.309           | 0.509         | 0.407     | -0.236    | -0.574             | -0.091                   | -0.216           | -0.151            | 1.000                  |              |                          |                     |                       |            |
|                            | 0.409            | 0.003              | 0.411          | 0.103            | 0.004         | 0.028     | 0.218     | 0.002              | 0.644                    | 0.270            | 0.563             | ----                   |              |                          |                     |                       |            |
| GHG_AGRI                   | -0.286           | -0.396             | -0.140         | -0.188           | -0.340        | -0.461    | 0.093     | 0.837              | 0.009                    | 0.424            | 0.516             | -0.405                 | 1.000        |                          |                     |                       |            |
|                            | 0.133            | 0.030              | 0.461          | 0.328            | 0.066         | 0.012     | 0.632     | 0.000              | 0.963                    | 0.025            | 0.034             | 0.027                  | ----         |                          |                     |                       |            |
| D_INFLATION_<br>FOOD       | 0.273            | 0.203              | 0.410          | 0.425            | 0.183         | 0.085     | -0.077    | 0.095              | -0.099                   | -0.147           | -0.396            | -0.263                 | -0.232       | 1.000                    |                     |                       |            |
|                            | 0.196            | 0.341              | 0.047          | 0.043            | 0.392         | 0.691     | 0.720     | 0.658              | 0.644                    | 0.494            | 0.180             | 0.215                  | 0.276        | ----                     |                     |                       |            |
| D_MEAT_CONS                | 0.499            | 0.356              | 0.299          | 0.057            | 0.363         | 0.582     | 0.222     | -0.430             | 0.196                    | -0.574           | 0.490             | 0.192                  | -0.266       | -0.032                   | 1.000               |                       |            |
|                            | 0.006            | 0.058              | 0.115          | 0.773            | 0.053         | 0.001     | 0.247     | 0.025              | 0.317                    | 0.001            | 0.046             | 0.319                  | 0.164        | 0.884                    | ----                |                       |            |
| D_FR_CONS_CAL              | 0.959            | 0.442              | 0.659          | 0.070            | 0.255         | 0.393     | 0.378     | -0.223             | -0.005                   | -0.324           | 0.168             | -0.112                 | -0.301       | 0.295                    | 0.493               | 1.000                 |            |
|                            | 0.000            | 0.016              | 0.000          | 0.723            | 0.182         | 0.035     | 0.043     | 0.264              | 0.979                    | 0.093            | 0.518             | 0.564                  | 0.112        | 0.161                    | 0.007               | ----                  |            |
| D_GDP2                     | 0.317            | 0.547              | 0.167          | 0.122            | 0.463         | 0.994     | 0.206     | -0.710             | 0.183                    | -0.571           | 0.355             | 0.368                  | -0.453       | 0.062                    | 0.591               | 0.408                 | 1.000      |
|                            | 0.094            | 0.002              | 0.385          | 0.537            | 0.011         | 0.000     | 0.284     | 0.000              | 0.350                    | 0.002            | 0.162             | 0.050                  | 0.014        | 0.774                    | 0.001               | 0.028                 | ----       |

Source: Authors' own interpretation with EViews

Note: the change of the average annual fruit consumption expressed in kg per capita (D\_FRUIT\_CONS), the average annual fruit consumption expressed in daily calories per capita (FRUIT\_CONS\_CAL), average fruit production expressed in kg per capita (FRUIT\_PROD), fruits export quantity excluding wine expressed in 1000 tonnes (FRUIT\_EXPORT), average meat and meat products consumption in the fresh meat equivalent expressed in kg per capita (MEAT\_CONS), the change of GDP per capita expressed in constant 2010 US\$ (D\_GDP), the change of net inflows of foreign direct investment expressed in % of GDP (D\_FDI), monthly average inflation rate for food goods expressed in % (INFLATION\_FOOD), the change of real effective exchange rate index expressed in 2010 = 100 (D\_EXCHANGE\_INDEX), the change of employment in agriculture expressed in % of total employment (D\_EMPLOYMENT), the change of government expenditure on education expressed in % of GDP (D\_GOV\_EXP\_EDU), annual temperature change expressed in °C for the meteorological year (TEMPERATURE\_CHANGE), the emissions of greenhouse gases in CO2 equivalent from agriculture expressed in thousand tonnes (GHG\_AGRI), the change of monthly average inflation rate for food goods expressed in % (D\_INFLATION\_FOOD), the change of the average meat and meat products consumption in the fresh meat equivalent expressed in kg per capita (D\_MEAT\_CONS), the change of the average annual fruit consumption expressed in daily calories per capita (D\_FRUIT\_CONS\_CAL), and the change of total GDP expressed in constant 2010 million US\$ (D\_GDP2).
